# Supplementary material
Source: publisher figshare collection journal article supplement (https://adisjournals.figshare.com/articles/dataset/_/22930667)
Supplement: Supplementary file 1 [file 1]

# Podcast on Challenges and Recommendations to Address Unmet Needs in MS for LGBTQ+ Populations in the United States

William L. Conte, Mark Cascione, Amy B. Sullivan

Compared with cisgendered heterosexual individuals, patients with multiple sclerosis (MS) who identify as lesbian, gay, bisexual, transgender, queer or questioning, plus other sexual identities (LGBTQ+) generally **have poorer health outcomes**

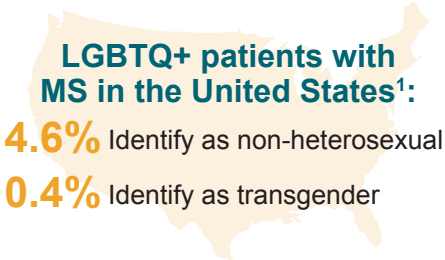

## What are the healthcare experiences of LGBTQ+ patients with MS?

Compared with heterosexual individuals, those with MS identifying as non-heterosexual:

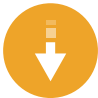

- Are **less** comfortable discussing **sexual health**<sup>1</sup>
- Have a **lower satisfaction** with their clinician<sup>1</sup>
- Had **fewer** visits to **psychological services**<sup>2</sup>

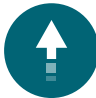

- Were **more likely** to change their MS treatment center and access a higher number of different centers<sup>2</sup>

**Transgender individuals with MS may have additional unique challenges<sup>3</sup>**

Young people who are transgender may experience particularly high rates of mental health distress, including:

Depression

Anxiety

Suicidality

Substance abuse



## What actions can be taken to improve healthcare for LGBTQ+ patients with MS?



Increase LGBTQ+ representation in educational materials<sup>3,4</sup>



Raise awareness of the challenges faced by LGBTQ+ individuals<sup>1,2</sup>



Diversity training for healthcare professionals (HCPs)<sup>3,5,6</sup>



Create specific LGBTQ+ MS support groups<sup>4</sup>



Ensure care is inclusive by being sensitive and gender-neutral<sup>3,4,7</sup>

The overarching goal is for **HCPs to be allies** to the **LGBTQ+** community to help address disparities in their quality of care and their overall health

**References:** 1. Khayambashi S, et al. Mult Scler Relat Disord. 2020;37:101440; 2. Lavorgna L, et al. Mult Scler Relat Disord. 2017;13:28-32; 3. Sullivan A, et al. Int J MS Care. 2022;24(1):35-40; 4. Anderson A, et al. Mult Scler Relat Disord. 2021;55:103214; 5. Rosendale N, et al. Neurology. 2019;93(4):159-166; 6. Rosendale N, Josephson SA. Neurology. 2017;89(24):e284-e287; 7. Coleman E, et al. Int J Transgend Health. 2022;23(suppl 1):S1-S259.
